# Supplementary material for: Polar Order Evolutions near the Rhombohedral to Pseudocubic and Tetragonal to Pseudocubic Phase Boundaries of the BiFeO3-BaTiO3 System
Source: MDPI journal article supplement (doi:10.3390/ma8125462), 2015-12-02
Supplement: s1 [file s1]

# Polar Order Evolutions near the Rhombohedral to Pseudocubic and Tetragonal to Pseudocubic Phase Boundaries of the BiFeO<sub>3</sub>-BaTiO<sub>3</sub> System

Yongxing Wei <sup>1,\*</sup>, Changqing Jin <sup>1</sup>, Yiming Zeng <sup>2</sup>, Xiaotao Wang <sup>3</sup>, Gang Xu <sup>1</sup> and Xiaoli Wang <sup>3</sup>

The results of X-ray diffraction (XRD) experiment

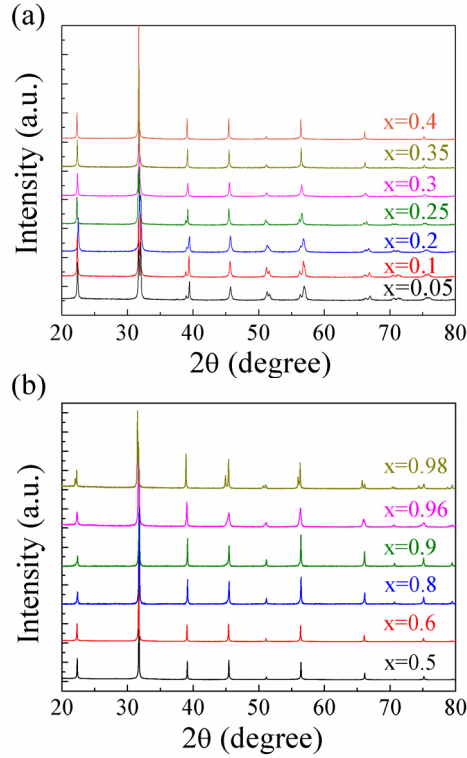

**Figure S1.** XRD patterns of (1-x)BF-xBT solid solution system with compositions of (a)  $x = 0.05$ –0.4 and (b) 0.5–0.98. All the compositions show the single perovskite structure, without the formation of secondary phase.

The XRD data for the compositions before and after poling

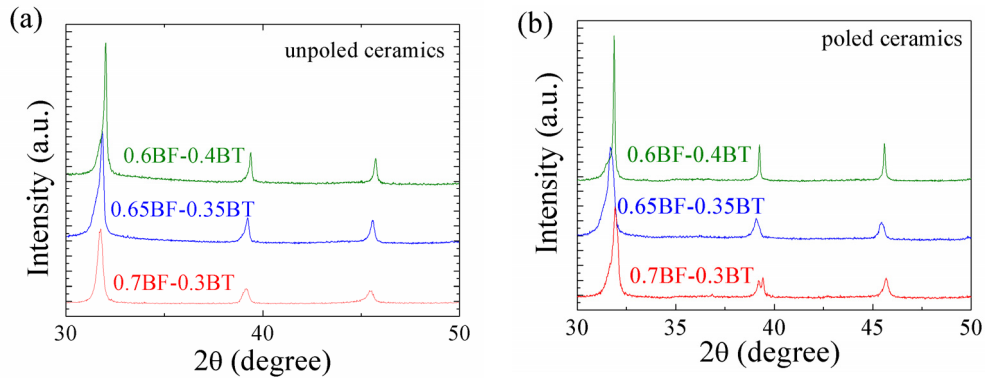

**Figure S2.** XRD patterns of (1-x)BF-xBT ( $x = 0.3, 0.35$  and 0.4) ceramics (a) before poling and (b) after poling. The splits of {111}<sub>c</sub> reflection are clear for 0.7BF-0.3BT ceramic after poling.
